# Supplementary material for: Qiita: rapid, web-enabled microbiome meta-analysis
Source: Springer Nature journal article supplement (doi:10.1038/s41592-018-0141-9), 2018-09-20
Supplement: 41592_2018_141_MOESM1_ESM.pdf [file 41592_2018_141_MOESM1_ESM.pdf]

In the format provided by the authors and unedited.

# Qiita: rapid, web-enabled microbiome meta-analysis

Antonio Gonzalez<sup>1,12</sup>, Jose A. Navas-Molina <sup>1,2,10,12</sup>, Tomasz Kosciolk<sup>1</sup>, Daniel McDonald<sup>1</sup>, Yoshiki Vázquez-Baeza<sup>1</sup>, Gail Ackermann<sup>1</sup>, Jeff DeReus<sup>1</sup>, Stefan Janssen<sup>1</sup>, Austin D. Swafford<sup>3</sup>, Stephanie B. Orchanian<sup>3</sup>, Jon G. Sanders<sup>1</sup>, Joshua Shorenstein<sup>1,11</sup>, Hannes Holste <sup>1,2</sup>, Semar Petrus<sup>4</sup>, Adam Robbins-Pianka<sup>5</sup>, Colin J. Brislawn<sup>6</sup>, Mingxun Wang<sup>7</sup>, Jai Ram Rideout <sup>8</sup>, Evan Bolyen<sup>8</sup>, Matthew Dillon<sup>8</sup>, J. Gregory Caporaso <sup>8,9</sup>, Pieter C. Dorrestein <sup>1,3,7</sup> and Rob Knight <sup>1,2,3\*</sup>

<sup>1</sup>Department of Pediatrics, School of Medicine, University of California, San Diego, La Jolla, CA, USA. <sup>2</sup>Department of Computer Science and Engineering, University of California, San Diego, La Jolla, CA, USA. <sup>3</sup>Center for Microbiome Innovation, University of California, San Diego, La Jolla, CA, USA.

<sup>4</sup>Department of Biology, University of California, San Diego, La Jolla, CA, USA. <sup>5</sup>Department of Computer Science, University of Colorado, Boulder, Boulder, CO, USA. <sup>6</sup>Earth & Biological Sciences Directorate, Pacific Northwest National Laboratory, Richland, WA, USA. <sup>7</sup>Collaborative Mass Spectrometry Innovation Center, Skaggs School of Pharmacy and Pharmaceutical Sciences, University of California, San Diego, La Jolla, CA, USA. <sup>8</sup>Pathogen and Microbiome Institute, Northern Arizona University, Flagstaff, AZ, USA. <sup>9</sup>Department of Biological Sciences, Northern Arizona University, Flagstaff, AZ, USA. <sup>10</sup>Present address: Google LLC, Mountain View, CA, USA. <sup>11</sup>Present address: Inscripta, Inc., Boulder, CO, USA. <sup>12</sup>These authors contributed equally: Antonio Gonzalez and Jose A. Navas-Molina. \*e-mail: [robknight@ucsd.edu](mailto:robknight@ucsd.edu)

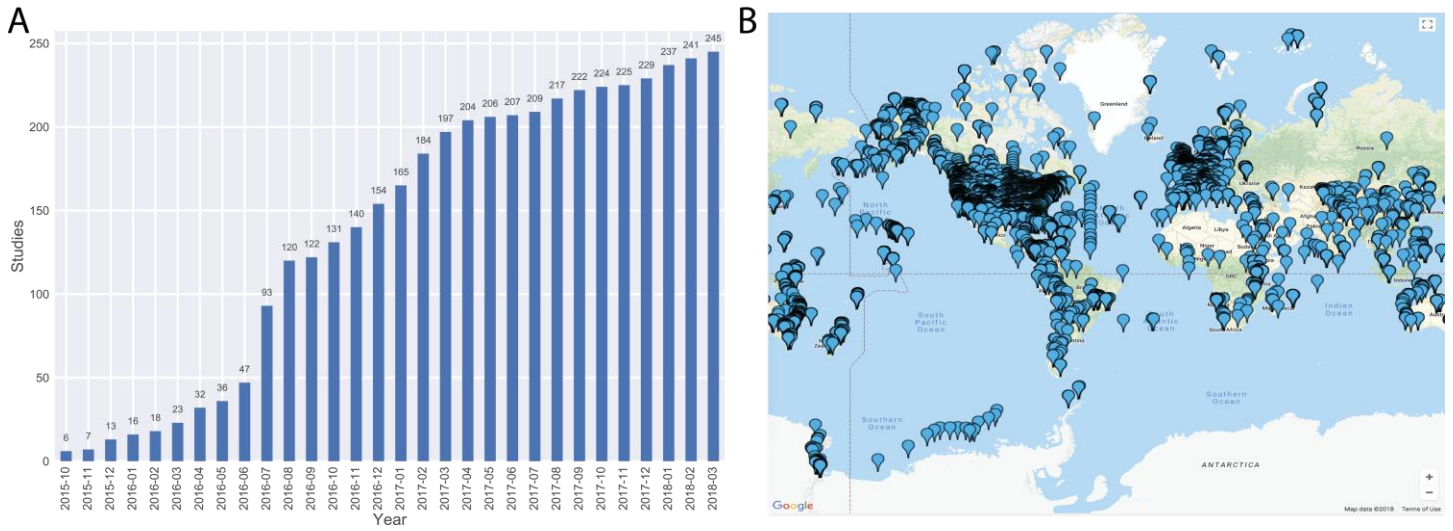

**Supplementary Figure 1**

Data loaded in Qiita and uploaded to EBI.

A. Monthly studies and sample depositions to EBI-ENA via Qiita. B. Geographical distribution of the samples present in Qiita.

## Supplementary Tables

| Step                                      | What's allowed?                                                                                                                                                                   | What's the expectation?                                                                                                                                                                                                                                                   |
|-------------------------------------------|-----------------------------------------------------------------------------------------------------------------------------------------------------------------------------------|---------------------------------------------------------------------------------------------------------------------------------------------------------------------------------------------------------------------------------------------------------------------------|
| Sample info file                          | At least 1 column: sample_name; any column name matching a MIMARKS column is Qiita admin verified to determine MIMARKS compliance                                                 | A full MIMARKS compliant file describing the samples and all important columns used for publication.                                                                                                                                                                      |
| Preparation info file                     | At least 1 column: sample_name, must match the sample names in the sample_name; any column name matching a MIMARKS column is Qiita admin verified to determine MIMARKS compliance | A full MIMARKS compliant file describing the processing done on the samples and all important columns used for publication.                                                                                                                                               |
| Processing - from raw data to BIOM tables | Processing appropriate for the data. For instance, metagenomic read mapping is not exposed for amplicon data.                                                                     | The user selects a set of parameters that make sense given their data.                                                                                                                                                                                                    |
| Analyses - combining BIOM tables          | The user can specify any combination of BIOM tables in the system.                                                                                                                | The system groups the selected tables by processing parameters and data types, and merges the tables within each group together such that differing parameter sets are not merged. The merge is done by the specific parameters in the commands that generated the files. |

Supplementary Table 1. Main Qiita steps and what's allowed within the system and the expectations for each of those steps.

| <b>Study name</b>                                                                                                                                             | <b>Qiita Study ID</b> | <b>Number of Samples</b> |
|---------------------------------------------------------------------------------------------------------------------------------------------------------------|-----------------------|--------------------------|
| Dynamic changes in short- and long-term bacterial composition following fecal microbiota transplantation for recurrent <i>Clostridium difficile</i> infection | 1924                  | 152                      |
| The Treatment-Naive Microbiome in New-Onset Crohn's Disease                                                                                                   | 1939, 1998            | 1359<br>284              |
| Dynamics of the gut microbiome in Inflammatory Bowel Disease                                                                                                  | 1629                  | 683                      |
| The Inflammatory Bowel Disease Multi'omics Database                                                                                                           | 11484                 | 2951                     |
| Structure, function and diversity of the healthy human microbiome (V35)                                                                                       | 1928                  | 6346                     |
| Structure, function and diversity of the healthy human microbiome (V13)                                                                                       | 1927                  | 3530                     |

Supplementary Table 2. Studies used for meta-analysis.
